# Supplementary material for: On the potential of models for location and scale for genome-wide DNA methylation data
Source: PubMed Central journal article supplement (PMC4227139; doi:10.1186/1471-2105-15-232), 2014-07-03
Supplement: 1471-2105-15-232-S2.pdf [file 1471-2105-15-232-S2.pdf]

# On the potential of models for location and scale for genome-wide DNA methylation data

Simone Wahl, Nora Fenske, Sonja Zeilinger, Karsten Suhre, Christian Gieger, Melanie Waldenberger, Harald Grallert, Matthias Schmid

## Additional file 2: Supplementary Tables

**Table S1: Description of the KORA F4 study population.** BMI, body mass index; WBC, white blood cell count.

| Variable                                    | Mean (sd)            | Median (range)           |
|---------------------------------------------|----------------------|--------------------------|
| Age (years)                                 | 60.9 (8.9)           | 61.0 (32.0, 81.0)        |
| BMI (kg/m <sup>2</sup> )                    | 28.1 (4.7)           | 27.5 (17.5, 47.6)        |
| WBC (/nl)                                   | 5.9 (1.6)            | 5.6 (2.7, 14.0)          |
| Alcohol intake (g/d)                        | 15.2 (19.5)          | 7.5 (0.0, 114.3)         |
|                                             | Absolute frequencies | Relative frequencies (%) |
| Sex (male/female)                           | 857/906              | 48.6/51.4                |
| Smoking state (never/former/current smoker) | 779/728/256          | 44.2/41.3/14.5           |
| Physical activity (active/inactive)         | 1012/751             | 57.4/42.6                |

**Table S2: Description of the KORA F3 study population.** BMI, body mass index; WBC, white blood cell count.

| Variable                                    | Mean (sd)            | Median (range)           |
|---------------------------------------------|----------------------|--------------------------|
| Age (years)                                 | 53.0 (9.6)           | 53.0 (35.0, 82.0)        |
| BMI (kg/m <sup>2</sup> )                    | 27.2 (4.6)           | 26.7 (15.1, 45.3)        |
| WBC (/nl)                                   | 7.3 (1.9)            | 7.1 (3.4, 15.1)          |
| Alcohol intake (g/d)                        | 16.1 (19.6)          | 7.7 (0.0, 106.0)         |
|                                             | Absolute frequencies | Relative frequencies (%) |
| Sex (male/female)                           | 252/234              | 51.9/48.1                |
| Smoking state (never/former/current smoker) | 249/0/250            | 49.9/0/50.1              |
| Physical activity (active/inactive)         | 241/245              | 49.6/50.4                |
